# Supplementary material for: Rootstock–Scion Interaction Affects Cadmium Accumulation and Tolerance of Malus
Source: Front Plant Sci. 2020 Aug 14;11:1264. doi: 10.3389/fpls.2020.01264 (PMC7457089; doi:10.3389/fpls.2020.01264)
Supplement: Supplementary file 1 [file Table_1.xlsx]

## Sheet: Table S1
Table S1 Primers used for qRT-PCR.
Gene name	Gene model	Description	Primer-Forward	Primer-Reverse
HA7	MDP0000266132a	PM H+-ATPase	5’-TGGCAGGGATGGATGTTC-3’	5’-TGCAGTTCTTTTATCGGTAGG-3’
FRO2-like	MDP0000742438b	Ferric reduction oxidase	5’-GGGGTTAATCTTCTGCTCTTCTCAT-3’	5’-CAGAGGAGCCTTCACAACCACT-3’
NRAMP1	MDP0000636971c	Natural resistance-associated	5’-CCGAAGTTATTGGCACAGCGTT-3’	5’-TTCACATAACCCATTTCCCCGA-3’
		macrophage protein
NRAMP3	MDP0000249325c	Natural resistance-associated	5’-GACGACGACTGCCAAACGCCG-3’	5’-CCACAGCACCATCCTCGCCCA-3’
		macrophage protein
HMA4	MDP0000189893a	P-type heavy metal ATPase	5’-GGCATCCGCTCGTTT-3’	5'-TTTGGGGTTTACAGGCT-3'
ABCC1	MDP0000903999a	ABC transporter C	5’-TGATGATCCCTTGAGTGC-3’	5’-TTTTGAACAGCGTGCC-3’
CAX4	MDP0000141538a	Vacuolar cation/proton exchanger	5’-TGGGAACTATTGAGGAAGCA-3’	5’-GCACAACGGAACAACGAAC-3’
NAS1	MDP0000908305c	Nicotinamide	5’-CGATGTTTCCAAGTTATGCCAA-3’	5’-TTCTCCAAAAGTCCTTCTGCCT-3’
MT2	MDP0000312784d	Metallothionein	5’-CAACGGGTGCGGGATGGCTCCTGAT-3’	5’-GCAGGGGTTGCAGGTGCAGCTATCC-3’
β-Actin	e		5’-TGGTGAGGCTCTATTCCAAC-3’	5’- TGGCATATACTCTGGAGGCT-3’
a: This primer was designed by ourselves. The gene name was based on the database of phytozome Malus domestica v1.0.
b: From Gao et al. 2011. Comparison of cadmium-induced iron-deficiency responses and genuine iron-deficiency responses in Malus xiaojinensis. Plant Science. 181:269-274.
c: From Zha et al. 2014. Both immanently high active iron contents and increased root ferrous uptake in response to low iron stress contribute to the iron deficiency tolerance in Malus xiaojinensis. Plant Science. 214:47-56.
d: From Wang et al. 2012. Cloning and expression analysis of metallothionein gene (MhMT2) in Malus hupehensis. Scientia Agricultura Sinica. 45(14):2904-2912.
e: From Kürkcüoglu et al. 2007. Identification of differentially expressed genes in Malus domestica after application of the non-pathogenic bacterium Pseudomonas fluorescens Bk3 to the phyllosphere. Journal of experimental botany. 58(3): 733-741.

## Sheet: Table S2
Table S2 Primary data on relative expression of genes in the roots
HA7												FRO2-like											NRAMP1											NRAMP3											HMA4
ID	Target gene	Average		action	Average		∆∆Ct	F=2^(-∆∆Ct)				ID	Target gene	Average		action	Average		∆∆Ct	F=2^(-∆∆Ct)			ID	Target gene	Average		action	Average		∆∆Ct	F=2^(-∆∆Ct)			ID	Target gene	Average		action	Average		∆∆Ct	F=2^(-∆∆Ct)			ID	Target gene	Average		action
HF/Mb-CK1-1	25.962	25.8008	24.9972	26.4598	26.3081	25.6586	0.152696	0.899568				HF/Mb-CK1-1	32.0082	32.0874	32.126	23.9963	24.1127	24.0461	-0.105305	1.07572			HF/Mb-CK1-1	24.8186	24.4273	24.3075	26.6665	26.7101	26.659	0.0672247	0.954472			HF/Mb-CK1-1	25.2765	25.3777	25.5408	25.5919	25.549	25.7095	-0.00132159	1.00092			HF/Mb-CK1-1	26.3016	26.1093	25.7044	25.3815
HF/Mb-CK1-2	25.7063			26.2231								HF/Mb-CK1-2	32.0999			23.8957							HF/Mb-CK1-2	24.0694			26.4204							HF/Mb-CK1-2	25.8122			25.0727							HF/Mb-CK1-2	25.9838			25.7949
HF/Mb-CK1-3	25.7341			26.2414								HF/Mb-CK1-3	32.1541			24.446							HF/Mb-CK1-3	24.394			27.0434							HF/Mb-CK1-3	25.0443			25.9823							HF/Mb-CK1-3	26.0427			25.9882
HF/Mb-CK2-1	25.2016	24.642		25.3406	25.3723		-0.0703207	1.04995				HF/Mb-CK2-1	32.2716	32.1203		23.8916	23.9238		0.116533	0.922402			HF/Mb-CK2-1	24.0554	24.3432		26.9858	26.571		0.122154	0.918815			HF/Mb-CK2-1	26.0241	25.6159		26.0143	25.7516		0.0343688	0.976459			HF/Mb-CK2-1	25.8897	25.5591		24.9285
HF/Mb-CK2-2	24.149			25.4707								HF/Mb-CK2-2	32.7358			23.9026							HF/Mb-CK2-2	24.5909			26.1229							HF/Mb-CK2-2	25.6211			25.8222							HF/Mb-CK2-2	25.3286			24.8287
HF/Mb-CK2-3	24.5753			25.3057								HF/Mb-CK2-3	31.3537			23.9771							HF/Mb-CK2-3	24.3832			26.6043							HF/Mb-CK2-3	25.2026			25.4182							HF/Mb-CK2-3	25.4591			24.8786
HF/Mb-CK3-1	24.5149	24.5488		24.7076	25.2953		-0.0864702	1.06177				HF/Mb-CK3-1	32.3792	32.1701		24.3099	24.1018		-0.0116923	1.00814			HF/Mb-CK3-1	24.1786	24.1521		26.9005	26.696		-0.193926	1.14387			HF/Mb-CK3-1	25.2294	25.6288		25.5541	25.828		-0.0292491	1.02048			HF/Mb-CK3-1	25.6949	25.4448		24.9474
HF/Mb-CK3-2	24.6494			25.9497								HF/Mb-CK3-2	32.2944			23.5605							HF/Mb-CK3-2	24.1923			26.5249							HF/Mb-CK3-2	25.6948			25.7686							HF/Mb-CK3-2	25.0613			25.3001
HF/Mb-CK3-3	24.4822			25.2286								HF/Mb-CK3-3	31.8368			24.4352							HF/Mb-CK3-3	24.0854			26.6627							HF/Mb-CK3-3	25.9621			26.1613							HF/Mb-CK3-3	25.5781			24.1237
HF/Mb-Cd1-1	26.1564	26.153		26.4451	26.4123		0.400693	0.757494				HF/Mb-Cd1-1	32.1053	32.4086		27.3705	27.1624		-2.83375	7.12923			HF/Mb-Cd1-1	32.7995	32.7287		27.7032	27.3948		7.68397	0.00486289			HF/Mb-Cd1-1	26.1471	25.9165		26.4743	26.3883		-0.301821	1.2327			HF/Mb-Cd1-1	31.4795	31.3526		26.2372
HF/Mb-Cd1-2	26.083			26.3128								HF/Mb-Cd1-2	32.6786			27.2876							HF/Mb-Cd1-2	32.7247			27.0263							HF/Mb-Cd1-2	26.0193			26.269							HF/Mb-Cd1-2	31.659			26.0326
HF/Mb-Cd1-3	26.2197			26.479								HF/Mb-Cd1-3	32.442			26.8291							HF/Mb-Cd1-3	32.6621			27.4548							HF/Mb-Cd1-3	25.5832			26.4217							HF/Mb-Cd1-3	30.9192			25.3349
HF/Mb-Cd2-1	26.5268	26.5383		26.2408	26.2938		0.904447	0.534238				HF/Mb-Cd2-1	32.5279	32.5819		26.7666	27.2036		-2.70172	6.50577			HF/Mb-Cd2-1	32.6455	32.9741		27.4564	27.5338		7.79032	0.00451732			HF/Mb-Cd2-1	26.0745	26.4406		26.5357	26.1263		0.484252	0.714867			HF/Mb-Cd2-1	32.8745	33.2694		27.675
HF/Mb-Cd2-2	26.4831			26.2802								HF/Mb-Cd2-2	32.2692			27.5406							HF/Mb-Cd2-2	32.936			27.6045							HF/Mb-Cd2-2	26.7399			25.6502							HF/Mb-Cd2-2	33.631			28.0071
HF/Mb-Cd2-3	26.6049			26.3605								HF/Mb-Cd2-3	32.9485			27.3036							HF/Mb-Cd2-3	33.3408			27.5404							HF/Mb-Cd2-3	26.5072			26.193							HF/Mb-Cd2-3	33.3027			27.641
HF/Mb-Cd3-1	26.3283	26.3122		26.7374	26.8061		0.166095	0.891252				HF/Mb-Cd3-1	32.8746	32.8061		27.4149	27.1268		-2.40072	5.28066			HF/Mb-Cd3-1	32.9823	32.7694		27.5354	27.4235		7.69587	0.00482293			HF/Mb-Cd3-1	26.0286	26.6141		26.8715	26.6024		0.181707	0.881659			HF/Mb-Cd3-1	32.6267	32.6513		26.8015
HF/Mb-Cd3-2	26.2295			26.8082								HF/Mb-Cd3-2	32.7243			26.9055							HF/Mb-Cd3-2	32.8564			27.3016							HF/Mb-Cd3-2	27.1996			26.5999							HF/Mb-Cd3-2	33.0093			26.7802
HF/Mb-Cd3-3	26.3789			26.8728								HF/Mb-Cd3-3	32.8195			27.0602							HF/Mb-Cd3-3	32.4694			27.4335							HF/Mb-Cd3-3	26.6141			26.3357							HF/Mb-Cd3-3	32.318			27.2908
FJ/Mb-CK1-1	27.7558	28.2097		26.2064	26.0041		2.86564	0.137201				FJ/Mb-CK1-1	33.4736	33.7845		27.6381	27.4969		-1.79236	3.46381			FJ/Mb-CK1-1	25.6238	25.6879		26.6417	26.1978		1.84009	0.279305			FJ/Mb-CK1-1	28.6612	28.872		26.0077	26.6433		2.39874	0.189631			FJ/Mb-CK1-1	27.6819	27.942		25.7503
FJ/Mb-CK1-2	28.7304			25.8684								FJ/Mb-CK1-2	33.7621			27.6889							FJ/Mb-CK1-2	25.4854			25.754							FJ/Mb-CK1-2	29.0495			26.8689							FJ/Mb-CK1-2	27.8687			25.7705
FJ/Mb-CK1-3	28.1431			25.9374								FJ/Mb-CK1-3	34.1178			27.1635							FJ/Mb-CK1-3	25.9546			26.1978							FJ/Mb-CK1-3	28.9054			27.0533							FJ/Mb-CK1-3	28.2753			25.4604
FJ/Mb-CK2-1	28.7399	28.6105		26.3037	26.3399		2.93061	0.131159				FJ/Mb-CK2-1	34.3476	34.3702		27.9681	27.9831		-1.69281	3.23287			FJ/Mb-CK2-1	25.5068	25.6599		26.1878	26.4504		1.55949	0.339272			FJ/Mb-CK2-1	28.928	29.0133		27.3319	27.1493		2.03401	0.244175			FJ/Mb-CK2-1	28.0484	27.8027		25.7334
FJ/Mb-CK2-2	28.5479			26.4428								FJ/Mb-CK2-2	34.2175			28.3314							FJ/Mb-CK2-2	25.803			26.1798							FJ/Mb-CK2-2	29.132			27.1001							FJ/Mb-CK2-2	27.4904			25.0682
FJ/Mb-CK2-3	28.5439			26.2733								FJ/Mb-CK2-3	34.5456			27.6497							FJ/Mb-CK2-3	25.6699			26.9838							FJ/Mb-CK2-3	28.98			27.016							FJ/Mb-CK2-3	27.8694			25.6508
FJ/Mb-CK3-1	27.1288	27.735		26.0764	25.7951		2.59987	0.164953				FJ/Mb-CK3-1	34.7652	34.7505		28.8625	28.5333		-1.86284	3.63723			FJ/Mb-CK3-1	25.4493	25.6303		26.3721	26.1902		1.79004	0.289163			FJ/Mb-CK3-1	29.023	29.1234		27.8042	27.8489		1.44447	0.367426			FJ/Mb-CK3-1	28.5898	28.7948		26.055
FJ/Mb-CK3-2	28.4078			25.5806								FJ/Mb-CK3-2	34.7423			28.3374							FJ/Mb-CK3-2	25.8046			26.3083							FJ/Mb-CK3-2	29.1905			28.2269							FJ/Mb-CK3-2	29.0665			26.6899
FJ/Mb-CK3-3	27.6683			25.7285								FJ/Mb-CK3-3	34.7438			28.4							FJ/Mb-CK3-3	25.6369			25.8902							FJ/Mb-CK3-3	29.1567			27.5156							FJ/Mb-CK3-3	28.7281			26.4724
FJ/Mb-Cd1-1	28.8099	28.9056		27.6692	27.2166		2.34904	0.196277				FJ/Mb-Cd1-1	32.8589	32.7423		28.015	28.0788		-3.4165	10.6775			FJ/Mb-Cd1-1	33.094	33.0507		27.5137	26.6146		8.78608	0.0022653			FJ/Mb-Cd1-1	28.0753	28.3759		28.2909	28.6438		-0.0978444	1.07017			FJ/Mb-Cd1-1	35.3167	35.2192		27.6473
FJ/Mb-Cd1-2	29.0681			26.8307								FJ/Mb-Cd1-2	32.9123			27.9092							FJ/Mb-Cd1-2	33.014			25.7089							FJ/Mb-Cd1-2	29.0099			28.6634							FJ/Mb-Cd1-2	35.0551			27.0244
FJ/Mb-Cd1-3	28.839			27.1499								FJ/Mb-Cd1-3	32.4556			28.3121							FJ/Mb-Cd1-3	33.044			26.6213							FJ/Mb-Cd1-3	28.0426			28.9771							FJ/Mb-Cd1-3	35.2859			27.6358
FJ/Mb-Cd2-1	28.6831	28.8743		26.7233	26.9326		2.6017	0.164744				FJ/Mb-Cd2-1	32.0473	32.4881		28.0724	28.0198		-3.61168	12.2243			FJ/Mb-Cd2-1	33.4682	33.2993		27.2238	26.9566		8.69273	0.00241672			FJ/Mb-Cd2-1	26.6991	26.8705		27.0109	26.9372		0.103286	0.930911			FJ/Mb-Cd2-1	34.6859	34.7331		26.8334
FJ/Mb-Cd2-2	29.1322			27.2086								FJ/Mb-Cd2-2	32.8597			28.0339							FJ/Mb-Cd2-2	33.1138			26.7027							FJ/Mb-Cd2-2	27.0419			27.1968							FJ/Mb-Cd2-2	34.807			26.9491
FJ/Mb-Cd2-3	28.8076			26.8659								FJ/Mb-Cd2-3	32.5573			27.9531							FJ/Mb-Cd2-3	33.316			26.9432							FJ/Mb-Cd2-3	26.8705			26.6039							FJ/Mb-Cd2-3	34.7065			26.3913
FJ/Mb-Cd3-1	29.6806	29.5414		27.7123	27.8009		2.40055	0.189393				FJ/Mb-Cd3-1	32.2955	32.3776		28.1759	28.0387		-3.74112	13.3718			FJ/Mb-Cd3-1	33.898	33.5866		26.84	26.9833		8.95323	0.00201748			FJ/Mb-Cd3-1	27.2677	27.5087		27.5399	27.4737		0.204928	0.867582			FJ/Mb-Cd3-1	34.4564	34.5446		26.8357
FJ/Mb-Cd3-2	29.4689			27.9561								FJ/Mb-Cd3-2	32.4264			27.8683							FJ/Mb-Cd3-2	33.2818			27.11							FJ/Mb-Cd3-2	27.983			27.0743							FJ/Mb-Cd3-2	34.4994			26.5052
FJ/Mb-Cd3-3	29.4747			27.7342								FJ/Mb-Cd3-3	32.4109			28.0721							FJ/Mb-Cd3-3	33.5799			27							FJ/Mb-Cd3-3	27.2753			27.8071							FJ/Mb-Cd3-3	34.6779			26.7005
HF/Mm-CK1-1	26.3228	26.6603		25.4517	25.4972		1.82309	0.282615				HF/Mm-CK1-1	29.448	29.5303		25.5009	25.7557		-4.30537	19.7718			HF/Mm-CK1-1	28.1434	28.7532		26.3464	26.3852		4.71798	0.0379968			HF/Mm-CK1-1	29.1916	28.9096		27.3949	27.1134		1.96619	0.255927			HF/Mm-CK1-1	27.9806	28.2341		25.8653
HF/Mm-CK1-2	26.8645			25.4094								HF/Mm-CK1-2	30.0792			26.0438							HF/Mm-CK1-2	29.213			26.4308							HF/Mm-CK1-2	28.2942			26.8986							HF/Mm-CK1-2	28.1542			25.8375
HF/Mm-CK1-3	26.7936			25.6306								HF/Mm-CK1-3	29.0636			25.7223							HF/Mm-CK1-3	28.9032			26.3786							HF/Mm-CK1-3	29.2429			27.0467							HF/Mm-CK1-3	28.5674			25.0514
HF/Mm-CK2-1	26.557	26.6765		25.312	25.3305		2.00606	0.248952				HF/Mm-CK2-1	29.7107	29.6905		25.7457	25.8765		-4.26596	19.2389			HF/Mm-CK2-1	28.6066	28.2268		25.5586	25.7408		4.83602	0.0350118			HF/Mm-CK2-1	27.8174	27.7509		26.2931	26.3027		1.61815	0.325752			HF/Mm-CK2-1	27.898	28.1136		25.265
HF/Mm-CK2-2	26.6627			25.2156								HF/Mm-CK2-2	29.657			25.9739							HF/Mm-CK2-2	28.2803			25.903							HF/Mm-CK2-2	28.0176			26.3023							HF/Mm-CK2-2	28.3059			25.6047
HF/Mm-CK2-3	26.8099			25.4638								HF/Mm-CK2-3	29.7038			25.9098							HF/Mm-CK2-3	27.7935			25.7608							HF/Mm-CK2-3	27.4175			26.3127							HF/Mm-CK2-3	28.137			25.4749
HF/Mm-CK3-1	26.408	26.3561		25.0054	24.8007		2.21534	0.215335				HF/Mm-CK3-1	29.9848	30.0005		26.013	25.9713		-4.05078	16.5733			HF/Mm-CK3-1	28.8699	28.6598		25.8141	25.8662		5.14351	0.028291			HF/Mm-CK3-1	28.3334	27.9384		26.4075	26.432		1.67642	0.312859			HF/Mm-CK3-1	27.8137	28.2817		25.1102
HF/Mm-CK3-2	26.1708			24.4627								HF/Mm-CK3-2	29.6829			25.9997							HF/Mm-CK3-2	28.1163			25.905							HF/Mm-CK3-2	27.9768			26.4232							HF/Mm-CK3-2	28.7497			26.4488
HF/Mm-CK3-3	26.4894			24.934								HF/Mm-CK3-3	30.3339			25.9013							HF/Mm-CK3-3	28.9931			25.8796							HF/Mm-CK3-3	27.5051			26.4653							HF/Mm-CK3-3	28.2817			25.6795
HF/Mm-Cd1-1	26.339	26.31		27.0353	27.2367		-0.266702	1.20305				HF/Mm-Cd1-1	29.1657	29.1068		27.5531	27.8628		-6.83608	114.253			HF/Mm-Cd1-1	31.4906	31.4544		27.6383	27.3768		6.42758	0.0116173			HF/Mm-Cd1-1	25.6209	25.2539		26.4169	26.8143		-1.39036	2.62145			HF/Mm-Cd1-1	34.0867	33.7541		28.4524
HF/Mm-Cd1-2	26.3811			27.5048								HF/Mm-Cd1-2	28.9978			28.1326							HF/Mm-Cd1-2	31.3849			27.4488							HF/Mm-Cd1-2	24.9243			27.045							HF/Mm-Cd1-2	33.5215			28.3935
HF/Mm-Cd1-3	26.21			27.1701								HF/Mm-Cd1-3	29.1568			27.9028							HF/Mm-Cd1-3	31.4877			27.0435							HF/Mm-Cd1-3	25.2166			26.9809							HF/Mm-Cd1-3	33.6541			28.473
HF/Mm-Cd2-1	26.699	26.5949		27.3557	27.4556		-0.20071	1.14926				HF/Mm-Cd2-1	30.8516	30.5462		28.4934	29.1934		-6.72719	105.946			HF/Mm-Cd2-1	31.8947	31.4869		27.4318	27.4819		6.35505	0.0122163			HF/Mm-Cd2-1	26.1602	26.0209		27.7177	27.6229		-1.43201	2.69822			HF/Mm-Cd2-1	33.4506	33.6641		28.4947
HF/Mm-Cd2-2	26.5575			27.5555								HF/Mm-Cd2-2	30.3808			29.5934							HF/Mm-Cd2-2	31.0791			27.1986							HF/Mm-Cd2-2	26.0816			27.1948							HF/Mm-Cd2-2	34.2109
HF/Mm-Cd2-3	26.5282											HF/Mm-Cd2-3	30.4062			29.4934							HF/Mm-Cd2-3	31.4869			27.8152							HF/Mm-Cd2-3	25.8209			27.9563							HF/Mm-Cd2-3	33.3308			28.0947
HF/Mm-Cd3-1	26.1625	26.2853		26.8935	27.0817		-0.13644	1.09919				HF/Mm-Cd3-1	30.1269	30.1645		28.9879	28.8975		-6.81303	112.441			HF/Mm-Cd3-1	30.9912	30.7927		27.239	27.5879		5.5548	0.0212735			HF/Mm-Cd3-1	25.9365	26.0624		27.4841	27.5304		-1.29798	2.45885			HF/Mm-Cd3-1	32.9097	33.2225		27.4082
HF/Mm-Cd3-2	26.4081			27.4034								HF/Mm-Cd3-2	30.5355			29.0072							HF/Mm-Cd3-2	30.9274			27.9368							HF/Mm-Cd3-2	26.1883			27.2433							HF/Mm-Cd3-2	33.3354			27.9531
HF/Mm-Cd3-3				26.9484								HF/Mm-Cd3-3	29.8312			28.6975							HF/Mm-Cd3-3	30.4593			27.5879							HF/Mm-Cd3-3	26.0624			27.8637							HF/Mm-Cd3-3	33.4225			27.5806
FJ/Mm-CK1-1	25.1575	25.0434		25.2813	25.674		0.0293556	0.979858				FJ/Mm-CK1-1	31.2673	31.5378		24.5093	24.439		-0.981152	1.97404			FJ/Mm-CK1-1	23.3563	23.3463		26.6773	26.6967		-1.00048	2.00066			FJ/Mm-CK1-1	27.1447	27.5023		25.6101	25.3169		2.35538	0.195416			FJ/Mm-CK1-1	32.0817	32.1165		25.4423
FJ/Mm-CK1-2	24.9959			26.1333								FJ/Mm-CK1-2	31.8722			24.6019							FJ/Mm-CK1-2	23.3062			26.8161							FJ/Mm-CK1-2	27.9265			24.6903							FJ/Mm-CK1-2	32.1514			25.4485
FJ/Mm-CK1-3	24.9767			25.6073								FJ/Mm-CK1-3	31.4739			24.2056							FJ/Mm-CK1-3	23.3763			26.5967							FJ/Mm-CK1-3	27.4356			25.6502							FJ/Mm-CK1-3	32.1165
FJ/Mm-CK2-1	24.9221	25.1599		25.5828	25.7392		0.0807669	0.945555				FJ/Mm-CK2-1	31.4417	31.3515		24.3197	24.3317		-1.06022	2.08525			FJ/Mm-CK2-1	22.6565	22.9324		25.6049	25.6959		-0.413534	1.33194			FJ/Mm-CK2-1	26.9049	27.2973		25.3249	25.5134		1.95397	0.258105			FJ/Mm-CK2-1	31.6579	32.0899		25.7628
FJ/Mm-CK2-2	25.4311			25.9289								FJ/Mm-CK2-2	31.3413			24.177							FJ/Mm-CK2-2	23.0416			26.1203							FJ/Mm-CK2-2	27.1231			25.2019							FJ/Mm-CK2-2	32.5552			26.2758
FJ/Mm-CK2-3	25.1266			25.7058								FJ/Mm-CK2-3	31.2715			24.4984							FJ/Mm-CK2-3	23.099			25.3626							FJ/Mm-CK2-3	27.864			26.0134							FJ/Mm-CK2-3	32.0566			26.0193
FJ/Mm-CK3-1	25.2397	25.0475		25.2001	25.5824		0.125075	0.916957				FJ/Mm-CK3-1	31.8461	31.2644		24.5887	23.9972		-0.812823	1.75665			FJ/Mm-CK3-1	23.2184	22.6005		25.7349	26.4424		-1.49198	2.81275			FJ/Mm-CK3-1	26.4822	26.7649		24.2999	24.7019		2.233	0.212715			FJ/Mm-CK3-1	30.5013	31.2773		25.7472
FJ/Mm-CK3-2	24.8552			25.8313								FJ/Mm-CK3-2	31.016			23.4191							FJ/Mm-CK3-2	22.3159			26.8167							FJ/Mm-CK3-2	26.7143			24.7705							FJ/Mm-CK3-2	31.7199			25.1311
FJ/Mm-CK3-3				25.7157								FJ/Mm-CK3-3	30.931			23.9839							FJ/Mm-CK3-3	22.2671			26.7758							FJ/Mm-CK3-3	27.0982			25.0352							FJ/Mm-CK3-3	31.6106			25.0392
FJ/Mm-Cd1-1	27.2562	27.5643		28.9712	28.9557		-0.73138	1.66023				FJ/Mm-Cd1-1	29.2788	29.5299		27.7725	27.6669		-6.21708	74.3921			FJ/Mm-Cd1-1	30.5489	30.4436		27.5392	27.2992		5.49439	0.0221831			FJ/Mm-Cd1-1	25.7589	25.9208		27.7067	27.3794		-1.28852	2.44278			FJ/Mm-Cd1-1	35.502	36.0686		27.1842
FJ/Mm-Cd1-2	27.9035			28.9736								FJ/Mm-Cd1-2	29.4476			27.4281							FJ/Mm-Cd1-2	30.3384			27.1926							FJ/Mm-Cd1-2	26.4161			27.252							FJ/Mm-Cd1-2	36.3019			28.0361
FJ/Mm-Cd1-3	27.5333			28.9224								FJ/Mm-Cd1-3	29.8632			27.8003							FJ/Mm-Cd1-3	30.4436			27.1659							FJ/Mm-Cd1-3	25.5875			27.1794							FJ/Mm-Cd1-3	36.402			27.6101
FJ/Mm-Cd2-1	26.8258	26.8857		28.6422	28.3072		-0.76159	1.69536				FJ/Mm-Cd2-1	29.1949	29.1952		28.0649	27.6194		-6.50427	90.778			FJ/Mm-Cd2-1	31.4291	31.5452		27.9377	28.3213		5.5739	0.0209938			FJ/Mm-Cd2-1	25.905	26.2723		27.3617	27.7989		-1.35661	2.56082			FJ/Mm-Cd2-1	35.0187	35.4616		27.0101
FJ/Mm-Cd2-2	27.0455			28.0723								FJ/Mm-Cd2-2	29.3287			27.5073							FJ/Mm-Cd2-2	31.9113			28.705							FJ/Mm-Cd2-2	26.3063			28.2362							FJ/Mm-Cd2-2	35.3046			26.3571
FJ/Mm-Cd2-3	26.7857			28.2072								FJ/Mm-Cd2-3	29.0618			27.2861							FJ/Mm-Cd2-3	31.2952			28.3213							FJ/Mm-Cd2-3	26.6056			27.7989							FJ/Mm-Cd2-3	36.0616			27.2836
FJ/Mm-Cd3-1	27.8893	27.4791		28.9307	28.6825		-0.543347	1.45735				FJ/Mm-Cd3-1	29.4166	29.8335		28.3693	28.1595		-6.40595	84.7976			FJ/Mm-Cd3-1	31.8242	31.8967		27.7562	27.6747		6.57194	0.0105111			FJ/Mm-Cd3-1	25.8768	26.3803		28.015	27.8149		-1.26464	2.40268			FJ/Mm-Cd3-1	36.1701	35.8899		27.1925
FJ/Mm-Cd3-2	27.1356			28.5009								FJ/Mm-Cd3-2	30.5838			27.6163							FJ/Mm-Cd3-2	31.6358			27.9266							FJ/Mm-Cd3-2	26.4838			27.9482							FJ/Mm-Cd3-2	35.9431			27.5631
FJ/Mm-Cd3-3	27.4125			28.6158								FJ/Mm-Cd3-3	29.5002			28.4928							FJ/Mm-Cd3-3	32.23			27.3414							FJ/Mm-Cd3-3	26.7803			27.4816							FJ/Mm-Cd3-3	35.5566			28.0278
[truncated: 40 more columns]

## Sheet: Table S3
Table S3 Primary data on relative expression of genes in the leaves
HA7											NRAMP3											HMA4											ABCC1											CAX4
ID	Target gene	Average		action	Average		∆∆Ct	F=2^(-∆∆Ct)			ID	Target gene	Average		action	Average		∆∆Ct	F=2^(-∆∆Ct)			ID	Target gene	Average		action	Average		∆∆Ct	F=2^(-∆∆Ct)			ID	Target gene	Average		action	Average		∆∆Ct	F=2^(-∆∆Ct)			ID	Target gene	Average		action	Average
HF/Mb-CK1-1	29.7116	29.5187	29.7863	27.4924	27.4835	27.6398	-0.114877	1.08288			HF/Mb-CK1-1	26.9361	27.0201	27.1164	27.5328	27.6436	27.6882	-0.0535636	1.03783			HF/Mb-CK1-1	31.3144	30.9925	31.2257	27.6376	27.446	27.7215	0.0365108	0.97501			HF/Mb-CK1-1	22.1479	22.5621	23.0733	27.5817	27.561	28.0787	0.0111357	0.992311			HF/Mb-CK1-1	27.9011	28.1797	28.4448	28.103	28.013
HF/Mb-CK1-2	29.1591			27.808							HF/Mb-CK1-2	27.1707			27.6878							HF/Mb-CK1-2	31.0372			27.0543							HF/Mb-CK1-2	22.7097			27.4069							HF/Mb-CK1-2	28.0583			27.9564
HF/Mb-CK1-3	29.6853			27.1502							HF/Mb-CK1-3	26.9534			27.7103							HF/Mb-CK1-3	30.6258			27.646							HF/Mb-CK1-3	22.8288			27.6943							HF/Mb-CK1-3	28.5797			27.9797
HF/Mb-CK2-1	30.0508	30.2133		27.943	28.0009		0.0624624	0.957628			HF/Mb-CK2-1	27.8692	27.5051		28.1264	28.1436		-0.0685076	1.04863			HF/Mb-CK2-1	31.5081	31.3987		28.2662	28.0031		-0.114363	1.0825			HF/Mb-CK2-1	23.0591	23.4279		28.6238	28.3988		0.0391088	0.973256			HF/Mb-CK2-1	28.9565	28.5512		28.4142	28.3626
HF/Mb-CK2-2	30.1426			28.1255							HF/Mb-CK2-2	27.0744			27.8276							HF/Mb-CK2-2	31.2893			28.0065							HF/Mb-CK2-2	23.5167			28.0405							HF/Mb-CK2-2	28.4792			28.2443
HF/Mb-CK2-3	30.4467			27.9342							HF/Mb-CK2-3	27.5718			28.477							HF/Mb-CK2-3				27.7364							HF/Mb-CK2-3	23.7079			28.5321							HF/Mb-CK2-3	28.2178			28.4292
HF/Mb-CK3-1	29.6275	29.6268		27.668	27.4349		0.0419124	0.971367			HF/Mb-CK3-1	26.4604	26.8241		27.0585	27.2774		0.116714	0.922286			HF/Mb-CK3-1	31.505	31.286		27.9785	27.7155		0.0604502	0.958965			HF/Mb-CK3-1	23.3824	23.2299		28.3728	28.2763		-0.0364918	1.02562			HF/Mb-CK3-1	28.3504	28.6034		28.3412	28.3768
HF/Mb-CK3-2	29.9595			27.5352							HF/Mb-CK3-2	26.9879			27.6297							HF/Mb-CK3-2	31.0004			27.486							HF/Mb-CK3-2	22.8107			28.0465							HF/Mb-CK3-2	28.9231			28.6124
HF/Mb-CK3-3	29.2935			27.1016							HF/Mb-CK3-3	27.0241			27.1441							HF/Mb-CK3-3	31.3527			27.6822							HF/Mb-CK3-3	23.4965			28.4097							HF/Mb-CK3-3	28.5368			28.1768
HF/Mb-Cd1-1	29.7331	29.5819		26.5969	26.4484		0.983502	0.505751			HF/Mb-Cd1-1	24.4668	24.5758		26.4172	26.5497		-1.40387	2.6461			HF/Mb-Cd1-1	31.0444	30.8786		26.9902	27.0664		0.302153	0.811041			HF/Mb-Cd1-1	21.6482	21.3038		27.2599	27.5896		-1.2758	2.42133			HF/Mb-Cd1-1	26.5244	26.1977		27.4675	27.4244
HF/Mb-Cd1-2	29.5973			26.6332							HF/Mb-Cd1-2	25.0515			26.7155							HF/Mb-Cd1-2	31.0794			27.2427							HF/Mb-Cd1-2	20.9927			27.8193							HF/Mb-Cd1-2	25.8643			27.2813
HF/Mb-Cd1-3	29.4152			26.115							HF/Mb-Cd1-3	24.2092			26.5164							HF/Mb-Cd1-3	30.5119			26.9664							HF/Mb-Cd1-3	21.2705			27.6896							HF/Mb-Cd1-3	26.2044			27.5244
HF/Mb-Cd2-1	29.8856	30.3324		27.0045	26.9463		1.2361	0.42452			HF/Mb-Cd2-1	24.4202	24.6837		27.2526	26.9155		-1.66181	3.16414			HF/Mb-Cd2-1	30.4822	30.6206		26.2935	26.5815		0.529115	0.69298			HF/Mb-Cd2-1	20.3363	20.7224		26.8983	27.0095		-1.27713	2.42356			HF/Mb-Cd2-1	26.5217	25.9039		27.1365	26.9308
HF/Mb-Cd2-2	30.446			26.8549							HF/Mb-Cd2-2	24.6139			26.7785							HF/Mb-Cd2-2	30.3924			26.9361							HF/Mb-Cd2-2	21.1751			27.3208							HF/Mb-Cd2-2	25.9528			26.6584
HF/Mb-Cd2-3	30.6658			26.9797							HF/Mb-Cd2-3	25.017			26.7155							HF/Mb-Cd2-3	30.9873			26.5148							HF/Mb-Cd2-3	20.6557			26.8095							HF/Mb-Cd2-3	25.2373			26.9974
HF/Mb-Cd3-1	29.9596	29.9718		27.3651	26.9318		0.889991	0.539617			HF/Mb-Cd3-1	25.1817	25.0809		27.1583	26.9989		-1.34801	2.54562			HF/Mb-Cd3-1	30.7941	30.5704		26.4693	26.8596		0.200794	0.870071			HF/Mb-Cd3-1	20.8206	20.7051		27.5273	27.2435		-1.52847	2.8848			HF/Mb-Cd3-1	25.2751	25.6758		26.6291	26.7447
HF/Mb-Cd3-2	29.6507			26.8319							HF/Mb-Cd3-2	24.6801			27.1729							HF/Mb-Cd3-2	30.2133			27.1832							HF/Mb-Cd3-2	20.3562			26.9932							HF/Mb-Cd3-2	26.0098			26.927
HF/Mb-Cd3-3	30.3051			26.5985							HF/Mb-Cd3-3	25.3809			26.6656							HF/Mb-Cd3-3	30.7037			26.9263							HF/Mb-Cd3-3	20.9384			27.2102							HF/Mb-Cd3-3	25.7425			26.6781
FJ/Mb-CK1-1	28.8413	28.9671		26.7746	26.6073		0.209849	0.864628			FJ/Mb-CK1-1	25.7728	26.0456		27.5617	27.3684		-0.75284	1.68511			FJ/Mb-CK1-1	30.0961	29.897		26.386	26.5391		-0.152142	1.11122			FJ/Mb-CK1-1	23.8159	23.4261		27.8429	27.6412		0.79492	0.576375			FJ/Mb-CK1-1	27.1895	27.221		27.8823	27.3606
FJ/Mb-CK1-2	29.0929			26.3733							FJ/Mb-CK1-2	25.9183			27.0418							FJ/Mb-CK1-2	29.8311			26.7255							FJ/Mb-CK1-2	23.4697			27.1728							FJ/Mb-CK1-2	27.5191			27.1722
FJ/Mb-CK1-3	28.9671			26.6739							FJ/Mb-CK1-3	26.4456			27.5018							FJ/Mb-CK1-3	29.7636			26.5058							FJ/Mb-CK1-3	22.9928			27.9079							FJ/Mb-CK1-3	26.9543			27.0272
FJ/Mb-CK2-1	29.6949	29.6886		26.9924	27.2435		0.295012	0.815066			FJ/Mb-CK2-1	24.9116	25.3142		26.9194	26.7124		-0.828218	1.77549			FJ/Mb-CK2-1	30.2544	30.5053		27.1049	26.9779		0.0174807	0.987956			FJ/Mb-CK2-1	23.3642	23.7196		28.0169	27.7417		0.987901	0.504211			FJ/Mb-CK2-1	27.4255	27.4849		27.6558	27.7836
FJ/Mb-CK2-2	30.0488			27.528							FJ/Mb-CK2-2	25.4168			26.4721							FJ/Mb-CK2-2	30.7563			26.8175							FJ/Mb-CK2-2	23.6418			27.5332							FJ/Mb-CK2-2	27.6109			27.578
FJ/Mb-CK2-3	29.3219			27.2102							FJ/Mb-CK2-3	25.6142			26.7457							FJ/Mb-CK2-3				27.0112							FJ/Mb-CK2-3	24.153			27.6751							FJ/Mb-CK2-3	27.4182			28.1169
FJ/Mb-CK3-1	30.0978	29.8227		26.968	27.3011		0.371645	0.772901			FJ/Mb-CK3-1	26.0413	25.7307		26.6771	27.1021		-0.801452	1.74285			FJ/Mb-CK3-1	31.1859	31.5686		28.0551	28.2716		-0.212975	1.15908			FJ/Mb-CK3-1	22.8204	23.042		27.4271	27.5608		0.491178	0.711444			FJ/Mb-CK3-1	27.9634	27.5768		27.5098	27.8164
FJ/Mb-CK3-2	29.5477			27.6542							FJ/Mb-CK3-2	25.5034			27.0938							FJ/Mb-CK3-2	31.9047			28.4548							FJ/Mb-CK3-2	23.3969			27.4271							FJ/Mb-CK3-2	27.6236			28.4564
FJ/Mb-CK3-3	29.8227			27.2811							FJ/Mb-CK3-3	25.6473			27.5355							FJ/Mb-CK3-3	31.6153			28.3049							FJ/Mb-CK3-3	22.9086			27.8282							FJ/Mb-CK3-3	27.1435			27.4831
FJ/Mb-Cd1-1	29.6528	29.9286		27.0351	26.7892		0.989443	0.503672			FJ/Mb-Cd1-1	24.1066	24.4748		26.9147	26.7851		-1.74038	3.34123			FJ/Mb-Cd1-1	29.8214	30.2736		26.6979	26.9805		-0.216937	1.16226			FJ/Mb-Cd1-1	22.0425	22.2596		27.1982	27.5018		-0.232246	1.17466			FJ/Mb-Cd1-1	25.9766	26.0734		27.9689	27.8717
FJ/Mb-Cd1-2	29.8044			26.8765							FJ/Mb-Cd1-2	24.7429			26.5222							FJ/Mb-Cd1-2	30.659			26.9298							FJ/Mb-Cd1-2	22.1433			27.9387							FJ/Mb-Cd1-2	26.1969			27.7411
FJ/Mb-Cd1-3	30.3286			26.4558							FJ/Mb-Cd1-3	24.5748			26.9185							FJ/Mb-Cd1-3	30.3402			27.3138							FJ/Mb-Cd1-3	22.5929			27.3685							FJ/Mb-Cd1-3	26.0467			27.905
FJ/Mb-Cd2-1	29.9513	30.2193		27.2883	26.9903		1.07906	0.473339			FJ/Mb-Cd2-1	24.2629	24.6752		26.5566	26.9421		-1.69697	3.24219			FJ/Mb-Cd2-1	31.2489	30.9284		27.2286	27.5204		-0.102009	1.07327			FJ/Mb-Cd2-1	23.2671	22.9573		27.8527	28.0796		-0.112323	1.08097			FJ/Mb-Cd2-1	26.07	26.0636		28.1788	27.7879
FJ/Mb-Cd2-2	30.161			26.7056							FJ/Mb-Cd2-2	24.7875			27.0276							FJ/Mb-Cd2-2	31.0013			27.8455							FJ/Mb-Cd2-2	22.6475			28.3732							FJ/Mb-Cd2-2	26.3572			27.7303
FJ/Mb-Cd2-3	30.5456			26.9769							FJ/Mb-Cd2-3	24.9752			27.2421							FJ/Mb-Cd2-3	30.5351			27.4871							FJ/Mb-Cd2-3	22.9573			28.0129							FJ/Mb-Cd2-3	25.7636			27.4546
FJ/Mb-Cd3-1	30.6019	30.4435		26.705	27.0467		1.24676	0.421394			FJ/Mb-Cd3-1	24.5412	24.3345		26.9567	26.5839		-1.67935	3.20285			FJ/Mb-Cd3-1	29.6387	29.6451		26.2436	26.3459		-0.210799	1.15733			FJ/Mb-Cd3-1	22.3484	22.0191		27.0242	26.9353		0.0938657	0.937009			FJ/Mb-Cd3-1	25.7953	25.8062		27.4775	27.348
FJ/Mb-Cd3-2	30.2851			27.0418							FJ/Mb-Cd3-2	24.3612			26.4111							FJ/Mb-Cd3-2	29.2514			26.5147							FJ/Mb-Cd3-2	21.6232			26.7797							FJ/Mb-Cd3-2	26.1838			27.1852
FJ/Mb-Cd3-3	30.4435			27.3934							FJ/Mb-Cd3-3	24.1012			26.3839							FJ/Mb-Cd3-3	30.0451			26.2792							FJ/Mb-Cd3-3	22.0858			27.0019							FJ/Mb-Cd3-3	25.4395			27.3813
HF/Mm-CK1-1	29.1797	29.3651		26.2159	26.7604		0.454758	0.729633			HF/Mm-CK1-1	25.42	25.5635		27.4703	26.9346		-0.8011	1.74243			HF/Mm-CK1-1	30.4834	30.0782		27.0834	26.7194		-0.151264	1.11054			HF/Mm-CK1-1	21.3231	21.1339		27.1852	27.3863		-1.24244	2.36598			HF/Mm-CK1-1	26.882	27.0862		27.3252	27.5116
HF/Mm-CK1-2	29.6172			26.9715							HF/Mm-CK1-2	25.8071			26.7323							HF/Mm-CK1-2	29.973			26.6888							HF/Mm-CK1-2	21.1579			27.6873							HF/Mm-CK1-2	27.3236			27.7313
HF/Mm-CK1-3	29.2985			27.0937							HF/Mm-CK1-3	25.4635			26.6013							HF/Mm-CK1-3	29.7782			26.3861							HF/Mm-CK1-3	20.9205			27.2863							HF/Mm-CK1-3	27.0528			27.4783
HF/Mm-CK2-1	28.3313	28.2989		26.1038	25.8157		0.333215	0.793766			HF/Mm-CK2-1	25.3462	25.3474		26.3543	26.5977		-0.680253	1.60242			HF/Mm-CK2-1	29.9457	29.7988		26.0551	26.163		0.125728	0.916541			HF/Mm-CK2-1	20.1146	20.3697		26.9853	26.5764		-1.19668	2.29212			HF/Mm-CK2-1	26.7724	26.7129		27.6947	27.2375
HF/Mm-CK2-2	27.9332			25.5276							HF/Mm-CK2-2	25.0154			26.8744							HF/Mm-CK2-2	30.0185			26.3043							HF/Mm-CK2-2	20.2915			26.5341							HF/Mm-CK2-2	27.0868			27.1136
HF/Mm-CK2-3	28.6323			25.8157							HF/Mm-CK2-3	25.6808			26.5644							HF/Mm-CK2-3	29.4321			26.1297							HF/Mm-CK2-3	20.703			26.2097							HF/Mm-CK2-3	26.2796			26.9042
HF/Mm-CK3-1	29.2012	29.3045		27.3167	26.9855		0.168932	0.889501			HF/Mm-CK3-1	26.3073	26.0768		27.9636	27.6322		-0.985312	1.97974			HF/Mm-CK3-1	30.8902	31.1202		28.321	27.9657		-0.355573	1.27949			HF/Mm-CK3-1	21.9997	21.7308		27.7492	27.8671		-1.12626	2.18292			HF/Mm-CK3-1	27.3173	27.2926		27.6298	27.7283
HF/Mm-CK3-2	29.7077			26.6211							HF/Mm-CK3-2	26.1464			27.8007							HF/Mm-CK3-2				27.5772							HF/Mm-CK3-2	21.5053			28.085							HF/Mm-CK3-2	26.9012			27.4268
HF/Mm-CK3-3	29.0045			27.0189							HF/Mm-CK3-3	25.7768			27.1322							HF/Mm-CK3-3	31.3502			27.9991							HF/Mm-CK3-3	21.6875			27.7671							HF/Mm-CK3-3	27.6592			28.1283
HF/Mm-Cd1-1	28.5009	28.8074		26.697	26.7398		-0.0824087	1.05878			HF/Mm-Cd1-1	24.3322	23.8911		26.5147	26.6664		-2.20529	4.61167			HF/Mm-Cd1-1	29.7244	30.0693		26.6235	26.2769		0.28248	0.822177			HF/Mm-Cd1-1	22.9598	22.8719		27.77	27.3708		0.511148	0.701664			HF/Mm-Cd1-1	27.9778	28.1255		28.1726	27.9389
HF/Mm-Cd1-2	28.7606			26.7493							HF/Mm-Cd1-2	23.9168			26.9515							HF/Mm-Cd1-2	30.0143			25.9969							HF/Mm-Cd1-2	22.6841			27.3049							HF/Mm-Cd1-2	28.2066			27.8386
HF/Mm-Cd1-3	29.1608			26.7732							HF/Mm-Cd1-3	23.4245			26.5331							HF/Mm-Cd1-3	30.4693			26.2102							HF/Mm-Cd1-3	22.9719			27.0375							HF/Mm-Cd1-3	28.1922			27.8056
HF/Mm-Cd2-1	29.3254	29.3935		27.5909	27.431		-0.187461	1.13876			HF/Mm-Cd2-1	24.7421	24.3061		26.7939	26.9985		-2.12242	4.35424			HF/Mm-Cd2-1	31.1778	31.3406		27.5467	27.3615		0.469096	0.722417			HF/Mm-Cd2-1	22.9243	23.0124		27.3681	27.4577		0.564731	0.676082			HF/Mm-Cd2-1	28.9814	29.0046		28.0977	28.5253
HF/Mm-Cd2-2	29.0284										HF/Mm-Cd2-2	24.2368			27.4031							HF/Mm-Cd2-2	31.8367			27.0763							HF/Mm-Cd2-2	23.2005			27.6806							HF/Mm-Cd2-2	28.8945			28.6196
HF/Mm-Cd2-3	29.8269			27.2711							HF/Mm-Cd2-3	23.9394			26.7985							HF/Mm-Cd2-3	31.0073			27.4615							HF/Mm-Cd2-3	22.9124			27.3243							HF/Mm-Cd2-3	29.138			28.8586
HF/Mm-Cd3-1	28.7043	28.8685		26.7212	26.9888		-0.270322	1.20608			HF/Mm-Cd3-1	24.0451	24.2056		27.2353	26.9278		-2.15218	4.44498			HF/Mm-Cd3-1	31.3544	31.1547		27.7539	27.357		0.287642	0.81924			HF/Mm-Cd3-1	23.6001	23.2445		27.8408	27.7638		0.490758	0.711651			HF/Mm-Cd3-1	29.0713	29.0036		28.7609	28.565
HF/Mm-Cd3-2	29.066			27.223							HF/Mm-Cd3-2	24.5728			26.687							HF/Mm-Cd3-2	31.0216			27.1601							HF/Mm-Cd3-2	22.9556			28.0201							HF/Mm-Cd3-2	28.8692			28.0357
HF/Mm-Cd3-3	28.8351			27.0221							HF/Mm-Cd3-3	23.999			26.8611							HF/Mm-Cd3-3	31.088			27.157							HF/Mm-Cd3-3	23.1778			27.4304							HF/Mm-Cd3-3	29.0702			28.8983
FJ/Mm-CK1-1	29.8878	29.8738		27.8574	27.7791		-0.0552414	1.03903			FJ/Mm-CK1-1	26.5551	27.0714		28.8075	28.5042		-0.862729	1.81847			FJ/Mm-CK1-1	31.2297	31.1798		27.9761	27.6908		-0.0210579	1.0147			FJ/Mm-CK1-1	22.1268	22.2995		28.9563	28.7846		-1.47505	2.77992			FJ/Mm-CK1-1	27.2649	26.9313		27.8232	28.0132
FJ/Mm-CK1-2	29.4599			27.8341							FJ/Mm-CK1-2	27.1878			28.0008							FJ/Mm-CK1-2	31.0632			27.3389							FJ/Mm-CK1-2	22.639			28.9461							FJ/Mm-CK1-2	26.9577			27.8697
FJ/Mm-CK1-3	30.2738			27.6458							FJ/Mm-CK1-3	27.4714			28.7042							FJ/Mm-CK1-3	31.2464			27.7575							FJ/Mm-CK1-3	22.1329			28.4512							FJ/Mm-CK1-3	26.5713			28.3465
FJ/Mm-CK2-1	30.2316	30.4521		28.9263	28.5426		-0.240525	1.18142			FJ/Mm-CK2-1	27.6787	27.1813		29.0826	28.8587		-1.10739	2.15456			FJ/Mm-CK2-1	32.1559	31.8212		28.6887	28.5405		-0.229295	1.17226			FJ/Mm-CK2-1	23.1091	23.0074		29.0656	29.2473		-1.22998	2.34564			FJ/Mm-CK2-1	27.9194	27.8119		28.3329	28.6517
FJ/Mm-CK2-2	30.4059			28.2923							FJ/Mm-CK2-2	27.0173			28.5015							FJ/Mm-CK2-2	31.9199			28.3256							FJ/Mm-CK2-2	22.839			29.4624							FJ/Mm-CK2-2	27.371			29.0371
FJ/Mm-CK2-3	30.7187			28.4093							FJ/Mm-CK2-3	26.848			28.9921							FJ/Mm-CK2-3	31.3879			28.6072							FJ/Mm-CK2-3	23.074			29.214							FJ/Mm-CK2-3	28.1452			28.585
FJ/Mm-CK3-1	29.9451	30.1919		28.0651	28.1996		-0.157611	1.11544			FJ/Mm-CK3-1	27.4584	27.6486		28.6577	29.0196		-0.800907	1.7422			FJ/Mm-CK3-1	31.0672	31.224		27.805	27.613		0.101021	0.932373			FJ/Mm-CK3-1	22.1185	22.009		28.7285	28.5719		-1.55296	2.93419			FJ/Mm-CK3-1	27.1387	26.9573		27.7983	28.0795
FJ/Mm-CK3-2	30.6055			28.0007							FJ/Mm-CK3-2	27.6056			29.2814							FJ/Mm-CK3-2	31.5808			27.2542							FJ/Mm-CK3-2	21.5594			28.7487							FJ/Mm-CK3-2	26.7758			28.4273
FJ/Mm-CK3-3	30.0253			28.5329							FJ/Mm-CK3-3	27.882			29.1196							FJ/Mm-CK3-3	31.024			27.7796							FJ/Mm-CK3-3	22.349			28.2386							FJ/Mm-CK3-3	26.9573			28.0128
FJ/Mm-Cd1-1	30.508	30.1463		28.0104	28.2197		-0.223403	1.16748			FJ/Mm-Cd1-1	24.9621	24.4683		28.2702	27.578		-2.53966	5.81452			FJ/Mm-Cd1-1	31.0227	31.408		27.5986	27.2144		0.683538	0.622636			FJ/Mm-Cd1-1	22.1518	21.774		28.2477	28.3695		-1.58549	3.00109			FJ/Mm-Cd1-1	26.0423	25.586		27.8946	27.7538
FJ/Mm-Cd1-2	29.7513			28.0958							FJ/Mm-Cd1-2	24.0412			27.2192							FJ/Mm-Cd1-2	31.4599			26.9636							FJ/Mm-Cd1-2	21.7296			28.5247							FJ/Mm-Cd1-2	25.4631			27.5797
FJ/Mm-Cd1-3	30.1797			28.5531							FJ/Mm-Cd1-3	24.4017			27.2447							FJ/Mm-Cd1-3	31.7413			27.0811							FJ/Mm-Cd1-3	21.4407			28.3362							FJ/Mm-Cd1-3	25.2527			27.7872
FJ/Mm-Cd2-1	30.2386	29.8857		28.1577	27.8802		-0.144492	1.10534			FJ/Mm-Cd2-1	24.7849	24.3908		27.6236	27.3857		-2.42483	5.36966			FJ/Mm-Cd2-1	31.7088	32.0069		28.2652	28.0332		0.463743	0.725103			FJ/Mm-Cd2-1	21.9604	21.8738		27.9277	28.1546		-1.27073	2.41284			FJ/Mm-Cd2-1	26.658	26.2292		28.4909	28.5092
FJ/Mm-Cd2-2	29.4996			27.5694							FJ/Mm-Cd2-2	24.3301			27.0144							FJ/Mm-Cd2-2	31.9984			27.5678							FJ/Mm-Cd2-2	21.4539			28.5148							FJ/Mm-Cd2-2	25.9338			28.8608
FJ/Mm-Cd2-3	29.9191			27.9136							FJ/Mm-Cd2-3	24.0575			27.519							FJ/Mm-Cd2-3	32.3136			28.2665							FJ/Mm-Cd2-3	22.2072			28.0212							FJ/Mm-Cd2-3	26.0959			28.1759
FJ/Mm-Cd3-1	30.1009	29.7428		27.8257	28.2336		-0.640826	1.55922			FJ/Mm-Cd3-1	23.9468	24.236		27.4011	27.3523		-2.5463	5.84136			FJ/Mm-Cd3-1	31.5633	31.8561		27.4728	27.594		0.752028	0.593768			FJ/Mm-Cd3-1	21.7955	21.998		28.1945	28.5808		-1.57277	2.97474			FJ/Mm-Cd3-1	25.5383	25.4537		27.0973	27.8062
FJ/Mm-Cd3-2	29.818			28.3081							FJ/Mm-Cd3-2	24.4587			27.5703							FJ/Mm-Cd3-2	32.0821			27.382							FJ/Mm-Cd3-2	21.8672			28.7003							FJ/Mm-Cd3-2	25.7024			28.4818
FJ/Mm-Cd3-3	29.3094			28.5669							FJ/Mm-Cd3-3	24.3027			27.0857							FJ/Mm-Cd3-3	31.9227			27.9274							FJ/Mm-Cd3-3	22.3313			28.8474							FJ/Mm-Cd3-3	25.1204			27.8395
[truncated: 21 more columns]

## Sheet: Fig. S1
Fig. S1 Images of the plants of four scion/rootstock combinations exposed to either 0 (CK) or 50 µM CdCl2 (Cd) for 18 days. HF/Mb and FJ/Mb, ‘Hanfu’ (HF) and ‘Fuji’ (FJ) apple grafted on rootstock M. baccata (Mb), respectively; HF/Mm and FJ/Mm, ‘Hanfu’ (HF) and ‘Fuji’ (FJ) apple grafted on rootstock M. micromalus ‘qingzhoulinqin’ (Mm), respectively.

## Sheet: Fig. S2
Fig. S2 Cadmium (Cd) localization in the roots of four scion/rootstock combinations exposed to either 0 (CK) or 50 µM CdCl2 (Cd) for 18 days. Arrows point to precipitates of Cd-dithizone. The histochemical detection of Cd in the roots of ‘Fuji’ (FJ) apple grafted on M. baccata (Mb) or M. micromalus ‘qingzhoulinqin’ (Mm) under 0 µM CdCl2 treatment was similar to that of ‘Hanfu’ (HF) apple grafted …

## Sheet: Fig. S3
Fig. S3 CAT (a1, a2), APX (b1, b2) and GR (c1, c2) in the roots (a1-c1) and leaves (a2-c2) of four scion/rootstock combinations exposed to either 0 or 50 µM CdCl2 for 18 days. Data are presented as the means of three biological replicates (±SE). Different letters on the bars indicate significant difference between the treatments. P-values of the ANOVAs of Cd2+ (Cd), scion (S) and rootstock (R) ar…

## Sheet: Fig. S4
Fig. S4 Relative expression levels of genes encoding proteins involved in Cd uptake, transprot and detoxification in fine roots (a1-a9) and leaves (b1-b7) of four scion/rootstock combinations exposed either to 0 µM or 50 µM CdCl2 for 18 d. Data are presented as the means of three biological replicates (±SE). Different letters on the bars indicate significant difference between the treatments. For…
